# Supplementary material for: Integrin α3β1 in hair bulge stem cells modulates CCN2 expression and promotes skin tumorigenesis
Source: Life Sci Alliance. 2020 May 18;3(7):e202000645. doi: 10.26508/lsa.202000645 (PMC7240742; doi:10.26508/lsa.202000645)
Supplement: Supplementary file 1 [file LSA-2020-00645_SdataF2.xlsx]

## Sheet: Fig2d
mouse genotype	mouse number	population: double staining CD34 alpha3	population: alpha3 positive (total)	% CD34, a3 positive per total alpha3 positive population
K14 Itga3 KO	1	1.68	15.08	11.1406
K14 Itga3 KO	2	0.97	14.27	6.79748
K14 Itga3 KO	3	1.48	15.78	9.37896
K14 Itga3 KO	4	0.9	14.9	6.04027
K14 Itga3 KO	5	0.48	9.37	5.12273
K14 Itga3 WT	1	3.61	72.11	5.00624
K14 Itga3 WT	2	3.17	55.07	5.75631
K14 Itga3 WT	3	2.28	48.58	4.69329
K14 Itga3 WT	4	0.44	58.24	0.755495
K14 Itga3 WT	5	0.84	53.94	1.55729
