# Supplementary material for: Integrin α3β1 in hair bulge stem cells modulates CCN2 expression and promotes skin tumorigenesis
Source: Life Sci Alliance. 2020 May 18;3(7):e202000645. doi: 10.26508/lsa.202000645 (PMC7240742; doi:10.26508/lsa.202000645)
Supplement: Supplementary file 3 [file LSA-2020-00645_SdataF4.xlsx]

## Sheet: tumor number
age (weeks)	K19 Itga3 WT mice																						K19 Itga3 KO mice																				P - value
	1	2	3	4	5	6	7	8	9	10	11	12	13	14	15	16	17	18	19	20	21	22	1	2	3	4	5	6	7	8	9	10	11	12	13	14	15	16	17	18	19	20
8	0	0	0	0	0	0	0	0	0	0	0	0	0	0	0	0	0	0	0	0	0	0	0	0	0	0	0	0	0	0	0	0	0	0	0	0	0	0	0	0	0	0	>0,999999999999999
9	0	0	0	0	0	0	0	0	0	0	0	0	0	0	0	0	0	0	0	0	0	0	0	0	0	0	0	0	0	0	0	0	0	0	0	0	0	0	0	0	0	0	>0,999999999999999
10	0	0	0	0	0	0	0	0	0	0	0	0	0	0	0	0	0	0	0	0	0	0	0	0	0	0	0	0	0	0	0	0	0	0	0	0	0	0	0	0	0	0	>0,999999999999999
11	0	0	0	0	0	0	0	0	0	0	0	0	0	0	0	0	0	0	0	0	0	0	0	0	0	0	0	0	0	0	0	0	0	0	0	0	0	0	0	0	0	0	>0,999999999999999
12	0	0	0	0	0	0	0	0	0	0	1	0	2	0	0	1	0	0	0	0	0	0	0	0	0	0	0	0	0	0	0	0	0	0	0	0	0	0	0	0	0	0	0.953072
13	0	0	0	1	0	1	1	1	0	1	10	1	12	0	4	12	1	5	2	7	8	5	0	0	0	0	0	0	0	0	6	3	0	0	1	0	0	0	1	4	3	0	0.442584
14	1	2	3	2	3	18	22	28	23	7	21	17	20	15	7	16	5	14	5	9	15	8	0	0	0	1	3	0	0	1	14	12	2	7	8	6	2	18	3	8	8	0	0.0197614
15	1.5	3	4	6	11	28	27	43	25	12	30	32	44	21	22	26	6	31	9	15	16	16	0	0	0	2	5	1	2	6	22	18	13	11	22	19	15	16	16	17	9	3	0.00189252
16	3	7	6	8	25	23	25	41	27	16	38	38	47	31	28	35	7	43	28	15	30	30	5	1	1	5	5	5	5	10	27	31	18	27	24	30	26	19	27	21	26	14	0.00499308
17	4.5	13	10	24	34	34	35	50	34	18	42	47	48	36	29	38	20	49	29	37	41	42	9	1	6	14	15	19	8	16	37	26	21	28	30	29	29	22	24	29	31	13	9.36806e-05
18	4.5	18	18	37	36	43	39	59	36	20	47	49	54	44	31	45	17	54	33	33	40	37	11	3	8	18	25	31	12	22	39	36	20	31	37	34	33	22	36	41	30	19	0.00055097
19	6.5	20	24	44	34	45	36	55	42	20	50	56	61	49	36	50	21	54	34	41	45	49	13	4	10	19	26	33	17	22	34	36	18	33	39	40	34	30	41	40	30	23	5.25245e-05
20	7.5	22	28	48	43	44	41	57	49	27	49	66	59	59	35	53	21	51	34	51	48	59	14	6	14	20	31	36	16	23	39		20	29	37	37	34	37	40	46	30	26	1.71649e-06
21	13	27	35	56	38	19	41	53	45	26	47	60	70	49	39	57	21	52	26	42	41	50	15	9	18	22	31	38	16	27	36		23	33	42	33	37	24	39	43	25	18	2.1415e-05
22	22	31	44	53	42	47	36	50	43	23		57	72	48	41	57	22	50	33	43	48	51	20	11	19	22	36	34	16	24	37		20	31	45	35	38	25	39	40	29	21	2.74499e-06
23	24	34	43	58	38	54	44	60	45	24		70	69	65	54	64	24	54	31	43	51	46	24	13	19		36	37	18	26	39		22	31	49	36	31	35	40	45	28		7.5552e-07
24	29	37	46	61	39	58	46	59	44	25		67	69	77	53	63	22	50	33	42	55	50	26	18	23		38	34	20	28	40		25	34	48	38	35	26	49	41	27		5.6038e-07
25	28	39	51	72	38	55	43	59	44	27		64	69	74	46	59	23	49			58	55	29	21	24		37	35	21	28	40		30	37	48	38	40	31	45	40			2.26156e-06
26	29	40	55	72	37	59	43	59	44	22		55	69	71	45	57	23	50			60	56	27	20	24		40	40	20	27	46		29	34	46		34	33	43	39			2.69067e-06
27	33	38	54	72	38	56	44	59	39	22		56	69	74	44	53	25	52			53	50	27	22	24		43	35	21	30	39		26	35	43		34		42	39			5.28122e-06
28	37	43	47	72	39	50	43	59	39	21		53	69	79	46	55	22	54			49	56	29	23	30		45	39	22	27	39		26	35	43		34		46	35			1.53328e-05
notes/legend	xx	animals had to be sacrificed due to tumor burden
		animals had to be sacrificed due to severe diarrhea; animals were excluded from the study as soon as the symptoms appeared

## Sheet: average tumor volume
age (weeks)	K19 Itga3 WT mice																						K19 Itga3 KO mice																				P - value
	1	2	3	4	5	6	7	8	9	10	11	12	13	14	15	16	17	18	19	20	21	22	1	2	3	4	5	6	7	8	9	10	11	12	13	14	15	16	17	18	19	20
8	0	0	0	0	0	0	0	0	0	0	0	0	0	0	0	0	0	0	0	0	0	0	0	0	0	0	0	0	0	0	0	0	0	0	0	0	0	0	0	0	0	0	>0,999999999999999
9	0	0	0	0	0	0	0	0	0	0	0	0	1	0	0	0	0	0	0	0	0	0	0	0	0	0	0	0	0	0	0	0	0	0	0	0	0	0	0	0	0	0	0.999772
10	0	0	0	0	0	0	0	0	0	0	0	0	0	0	0	0	0	0	0	0	0	0	0	0	0	0	0	0	0	0	0	0	0	0	0	0	0	0	0	0	0	0	>0,999999999999999
11	0	0	0	0	0	0	0	0	0	0	0	0	0	0	0	0.75	0	0	0	0	0	0	0	0	0	0	0	0	0	0	0	0	0	0	0	0	0	0	0	0	0	0	0.999829
12	0	0	0	0	0	0	0	0	0	0	0.5	0	0.75	0	0	0.5	0	0	0	0	0	0	0	0	0	0	0	0	0	0	0	0	0	0	0	0	0	0	0	0	0	0	0.999601
13	0	0	0	0.25	0	0.25	0.25	0.5	0	0.25	12	0.25	6	0	1.75	5.75	0.5	0.25	1	3.5	4	2.5	0	0	0	0	0.25	0	0	0	3	0	1.25	0	0.5	0	0	0	0.25	2	1.25	0	0.993233
14	4	0.75	5	1	3.25	37	46.5	40	40.75	3.5	55	19	43	18	5	29	2.5	8.5	2.5	4.5	7.5	4	0	0	0	0.5	1.25	0	0	0.5	31.25	1	21.5	3.25	5.5	8	0.75	11.25	1.25	9.25	4	0	0.938195
15	2.5	1.5	2	4.5	27.75	84.5	110	199.5	96	9.5	125	81.5	97.5	39.5	25	58.25	4.5	30.5	9.75	23	25.25	11.5	0	0	0	0.75	7.75	0.25	1	3	77.25	20.25	48.75	10.75	44.25	54.75	35.25	36	37.75	25.75	13.25	1.5	0.861726
16	3.25	3.25	2.75	10.75	74.75	115.25	111	195.25	132.75	34	241.25	132.75	145.25	141.5	70.5	152.25	10.25	137.5	68	33.75	72.75	74.5	5.75	0.5	0.5	2.25	22.25	2.25	2.5	19	110.5	49.25	108.5	79.75	84.25	94.5	75.75	63.25	65.25	73	56.5	20.75	0.789485
17	5.75	22	10	24	143.75	168.75	135.25	267	123.25	75.75	279	203	265.5	180	94	191.5	45	230.5	51.25	125.75	118.25	87.5	44.5	0.5	32.75	13.75	56	26.25	4	55.5	194.75	52.25	152	93.25	163.5	149	146.5	100.25	70	123.5	67.75	25.75	0.749169
18	7.5	80.25	34.75	103.5	219.5	259.5	205.75	551	231.5	99.5	254.5	398.25	583.75	487.5	180.5	341.75	55.75	331	77.5	128	174.75	119.75	36	1.25	34	49	109.25	93	28.75	112.5	154.75	55.5	227	132.25	178.5	154	176.75	130.75	186.75	175.5	114.75	37.5	0.471224
19	13.25	160.5	63.5	304.75	277.25	447.5	357.5	982	531	110.5	301.25	657	687.25	557.5	209.5	339.75	100.25	379.75	144	254.25	460.75	297	54.5	5.25	73	96	237.75	229.75	88	114.75	211.5	130.25	369.5	277.25	167.5	215.5	183.25	166.5	233.5	299.25	163.75	60.5	0.262229
20	29.5	218	95.75	676.25	395	851.5	403.5	1610.5	707.5	178	343.75	978	819.5	843.5	185	462.5	179	623.25	226.75	378.5	710.5	561.5	113.75	11.75	146	144	287.5	408.75	190.5	183	611.5		205.5	592	257	324	232.5	203	372.5	534	217	72.5	0.116676
21	103.75	339	129.5	1293.5	591.75	919.75	405.25	1948.25	741.75	197.5	364.5	2530.25	1784.25	1678	366.25	738.75	259.75	1078.75	262.5	421.5	993.5	755.5	169.25	29.75	311.25	149.75	482.25	816.25	257.75	257	802.5		131	880	448	379.5	331	229.75	542.25	791.5	246	64	0.00793513
22	181.25	703.75	163.75	2232.75	905.5	1297.5	478	3035.5	721	264.5		3705.5	2464.5	2166.5	391	1081	282.5	1344.25	515.25	475	1310	1059.75	313.5	97.25	404.5	208.75	506.75	1074.25	300.5	362	850.5		85	993.5	783.5	448.5	541	311	693	1239.75	279.5	78.5	3.62872e-05
23	268.75	1034	251.75	2718.5	1027.5	2404.5	1033	4098.75	1691.75	393.75		3532	2882.5	2736	553.5	1586	249.5	1630.25	513.75	734.75	2261	1509.25	408.5	196.5	658.25		666.25	1517	362.75	452	781.5		300.5	1509.5	856	580	581.5	419.5	616	1434.75	298		1.36567e-07
24	545.5	1085	370.75	3874.75	1185.5	2900.5	1139	4232	2183.5	511.5		3434	3048.5	2736	818	1900	272.5	1882.75	1026.5	1087.5	2695.5	1840	485.75	197.5	820		796.75	2007.25	484	621.25	708.5		364	2048	661	414	599.5	265	768.5	1826	370		5.12694e-10
25	907.75	1691.5	544.5	3574	1120.5	3383	1456	3599	1988	574.5		3252.75	3497.25	2736	1044.5	1859	311	2322			2919	2041.5	630	421.5	1080		1168.75	2078.25	622.75	939.75	605		440	2066.5	800.25	520.5	455.5	322.5	786.75	2040			3.71309e-10
26	1229	1627.5	840.25	3574	1680.25	3295	1622	3599	2090	700.5		2498.75	3804.25	2736	1582.25	1724.75	292.5	2366.5			3227	2288.25	652	561	1417.25		2101.25	1982.25	702.75	1109.25	533.5		384.5	2533	828.5		434.5	286.75	1047.75	2207			1.04024e-08
27	1743.5	1832	1000.75	3574	2039.5	2955.25	1582.5	3599	2056	793.75		2998.25	4440	2736	1697.75	2257.5	314.5	2724.5			2980.5	2154.5	917	720.25	1675		1762	2705.25	710.75	1292	479.5		366.5	2581.75	687.75		430.25		1508	1931			2.52083e-08
28	2105	1495.5	714	3574	2055	2945	1548	3599	2428.5	907		2832.5	4191.5	2736	1647	2323	615	2734			2919	2256	468	1147	1438		1939	2226	688	867	503		485.5	2719.5	713.5		453		2038	2703			7.67409e-08
notes/legend	xx	animals had to be sacrificed due to tumor burden
		animals had to be sacrificed due to severe diarrhea; animals were excluded from the study as soon as the symptoms appeared
